# Supplementary material
Source: MDPI journal article supplement (https://www.mdpi.com/2071-1050/13/16/9314)
Supplement: s1 [file s1]

Archive with 2 entries (2 files):
- sustainability-1291675-Figure S1.pdf
- sustainability-1291675-Table S1.pdf
